# Supplementary material for: Li3MRuO5 (M = Co, Ni), new lithium-rich layered oxides related to LiCoO2: promising electrochemical performance for possible application as cathode materials in lithium ion batteries
Source: Royal Society of Chemistry journal article supplement (doi:10.1039/c3ta12186k), 2013-01-01
Supplement: c3ta12186k.pdf [file c3ta12186k.pdf]

*Electronic Supplementary Information(ESI) for*

## **Li<sub>3</sub>MRuO<sub>5</sub> (M = Co, Ni), New Lithium-Rich Layered Oxides Related to LiCoO<sub>2</sub>: Promising Electrochemical Performance for Possible Application as Cathode Materials in Lithium Ion Batteries**

**S. Laha,<sup>†,‡</sup> E. Morán,<sup>\*,†</sup> R. Sáez-Puche,<sup>†</sup> M. Á. Alario-Franco,<sup>†,⊥,#</sup> A. J. Dos santos-García,<sup>†,±</sup>  
E. Gonzalo,<sup>⊥</sup> A. Kuhn,<sup>⊥</sup> S. Natarajan,<sup>‡</sup> J. Gopalakrishnan,<sup>‡</sup> F. García-Alvarado,<sup>\*,⊥</sup>**

*\*corresponding authors: FG: [flaga@ceu.es](mailto:flaga@ceu.es); EM: [emoran@quim.ucm.es](mailto:emoran@quim.ucm.es)*

*†Departamento de Química Inorgánica, Facultad de Ciencias Químicas, Universidad Complutense de Madrid, 28040 Madrid, Spain*

*‡Solid State and Structural Chemistry Unit, Indian Institute of Science, Bangalore 560012, India*

*±Departamento de Química Industrial y Polímeros, E.U.I.T.I., Universidad Politécnica de Madrid, 28012 Madrid, Spain*

*⊥Department of Chemistry, Facultad de Farmacia, Universidad CEU San Pablo, 28668 Boadilla del Monte, Madrid, Spain*

*#Emeritus Professor: Universidad CEU San Pablo*

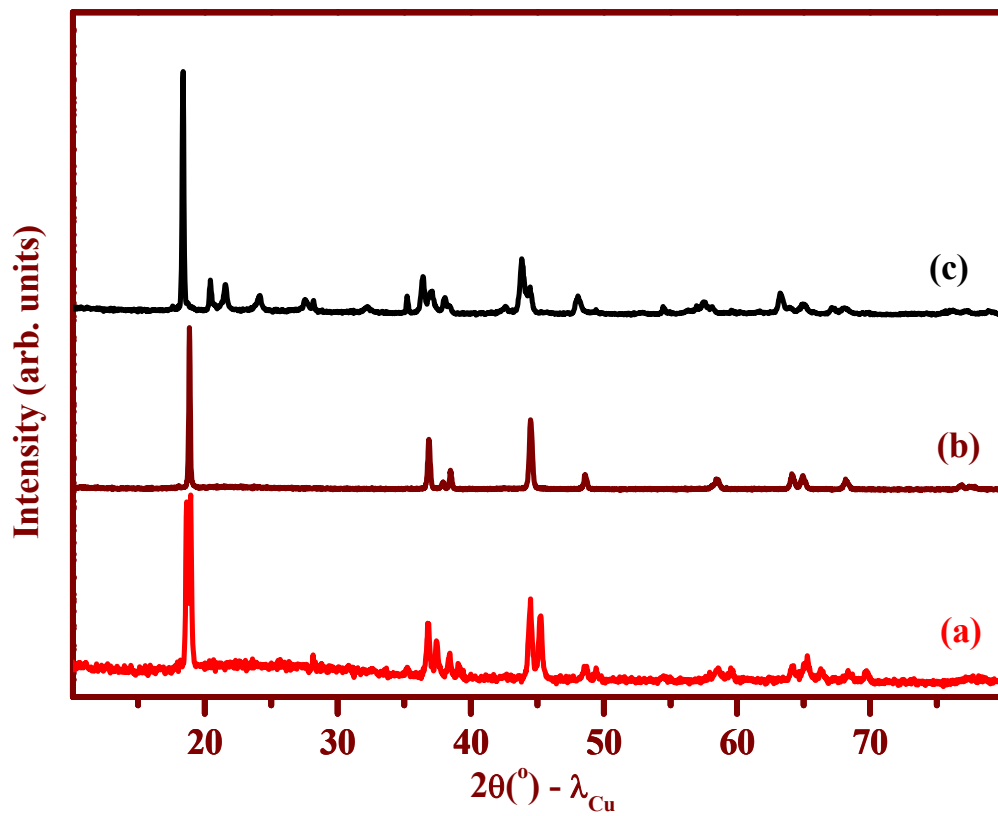

Fig. S1. PXRD patterns of  $\text{Li}(\text{Li}_x\text{Co}_{1-3x}\text{Ru}_{2x})\text{O}_2$ : (a)  $x = 0.1$ ; (b)  $x = 0.2$ ; (c)  $x = 0.3$ .

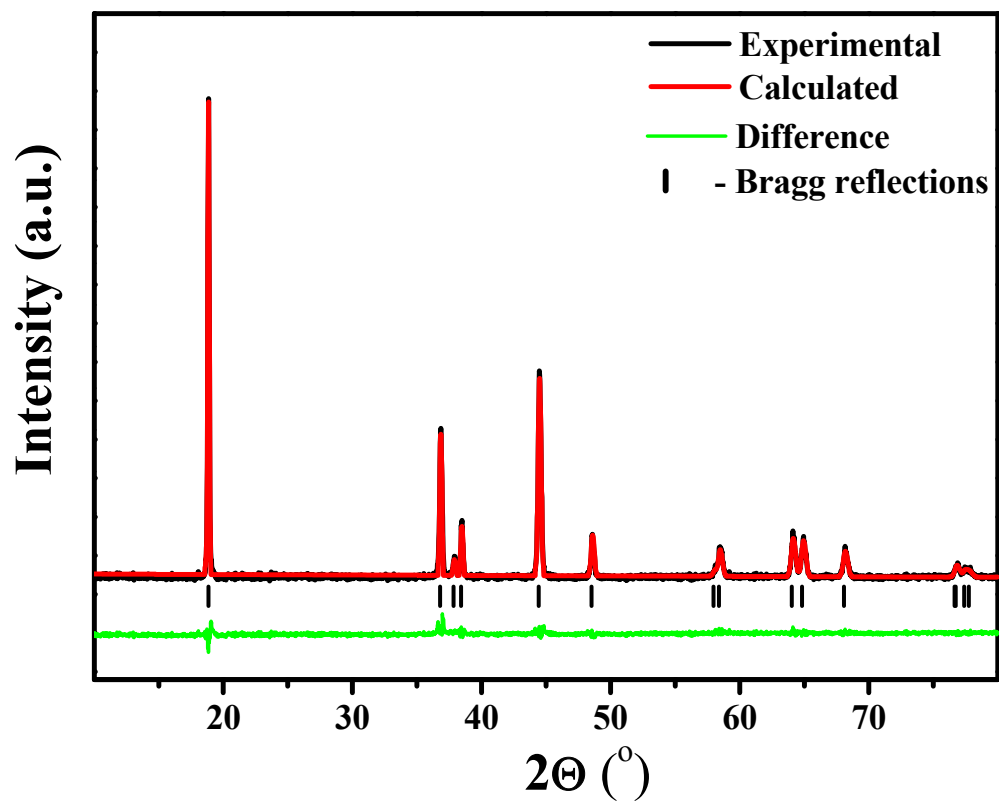

Fig. S2. Rietveld refinement of the structure of  $\text{Li}_3\text{CoRuO}_5$  from PXRD data.

Table S1. Atomic coordinates and isotropic displacement parameters ( $U_{\text{iso}}$ ) for  $\text{Li}_3\text{CoRuO}_5$ .

| Atom | site | x | y | z        | $U_{\text{iso}}(\text{\AA}^2)$ | Occupancy |
|------|------|---|---|----------|--------------------------------|-----------|
| Li   | 3(a) | 0 | 0 | 0        | 0.047(8)                       | 0.977(1)  |
| Co   | 3(a) | 0 | 0 | 0        | 0.036(9)                       | 0.023(1)  |
| Ru   | 3(a) | 0 | 0 | 0        | 0.036(9)                       | 0.000(1)  |
| Li   | 3(b) | 0 | 0 | 0.5      | 0.047(8)                       | 0.223(1)  |
| Co   | 3(b) | 0 | 0 | 0.5      | 0.010(1)                       | 0.377(1)  |
| Ru   | 3(b) | 0 | 0 | 0.5      | 0.010(1)                       | 0.400(1)  |
| O    | 6(c) | 0 | 0 | 0.245(1) | 0.008(2)                       | 1.000     |

Space group R-3m,  $a = 2.888(1)$ ,  $c = 14.387(1)$  Å

Reliability Factors:  $R_p = 5.90$ ,  $R_{wp} = 8.87$ ,  $R_F^2 = 4.84$ ,  $\chi^2 = 1.33$

Bond Lengths (Å): Li(3a)–O =  $2.094(1) \times 6$ ; Li/Co/Ru(3b)–O =  $2.015(1) \times 6$

Bond Angles ( $^\circ$ ): O(1)–Li/Co/Ru(3a)–O(2) =  $87.18(1)$ ; O(1)–Li/Co/Ru(3a)–O(3) =  $92.82(1)$ ; O(1)–Li/Co/Ru(3b)–O(2) =  $91.58(1)$ ; O(1)–Li/Co/Ru(3b)–O(3) =  $88.42(1)$

Bond valence sums: Li (3a) = 1.10; Co(3a) = 1.72; Li (3b) = 1.36; Co (3b) = 2.16; Ru (3b) = 3.68
